# Supplementary material for: Genetic inactivation of zinc transporter SLC39A5 improves liver function and hyperglycemia in obesogenic settings
Source: eLife journal article supplement (doi:10.7554/elife.90419), 2023-09-19

Figure 5

A

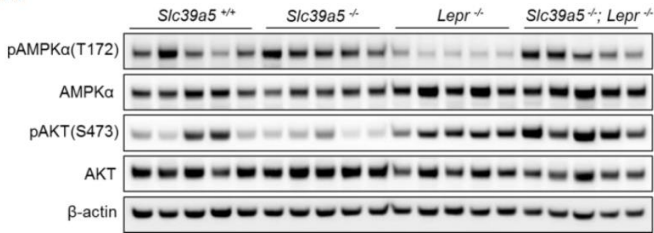

pAMPK

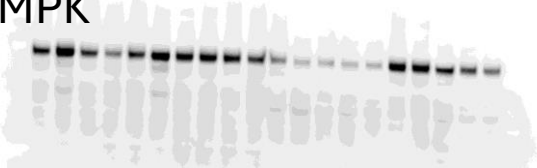

AMPK

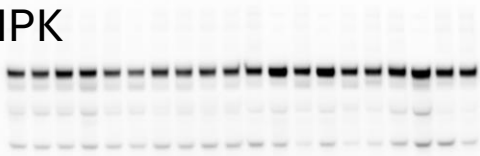

pAKT

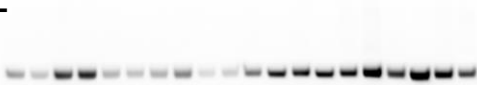

AKT

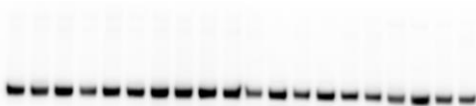

Female

Bactin

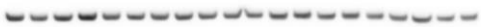

Female

D

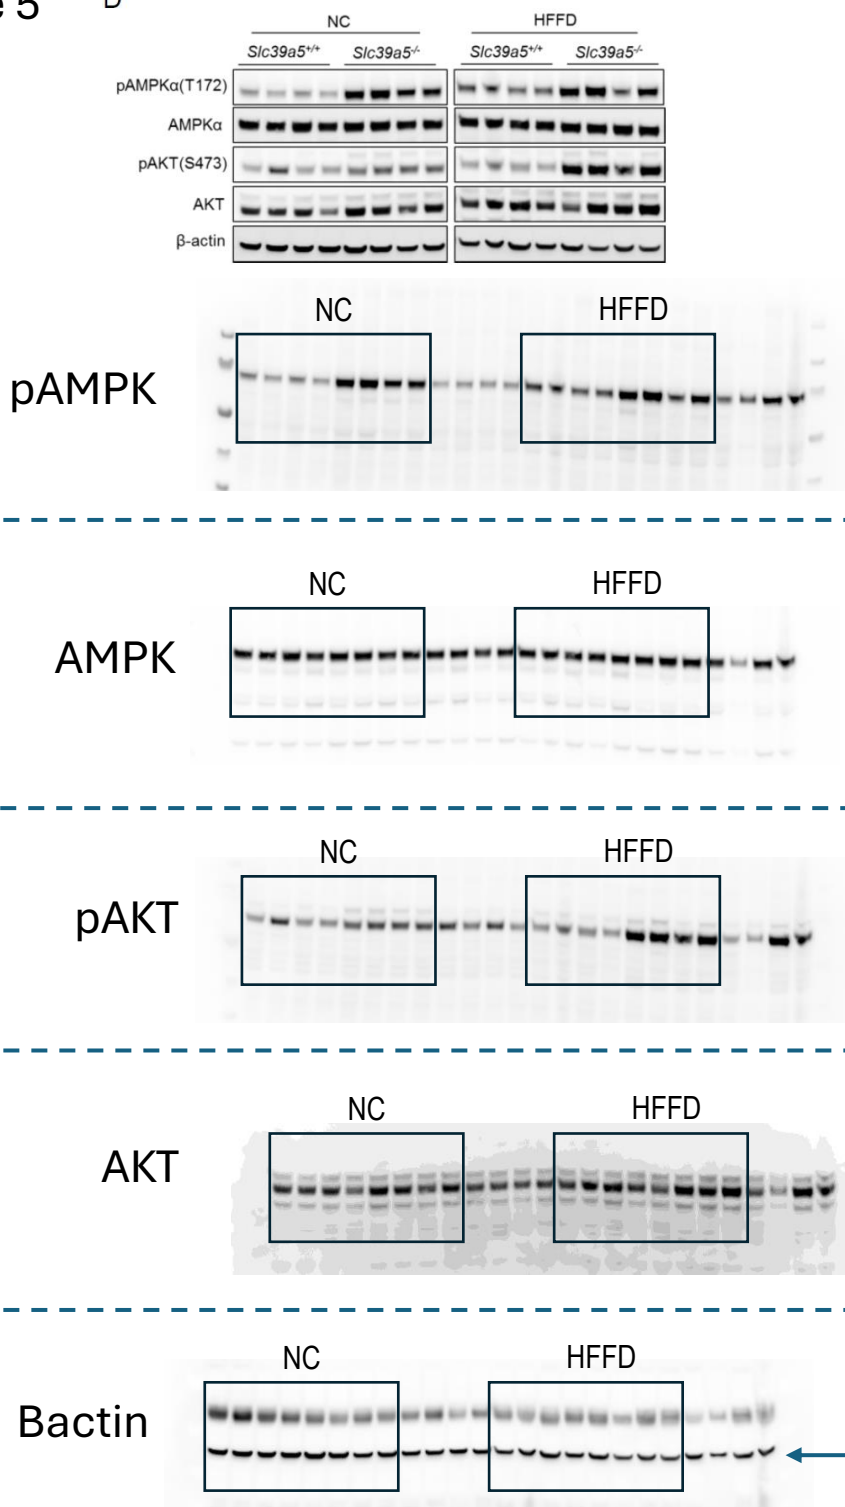

Figure 5

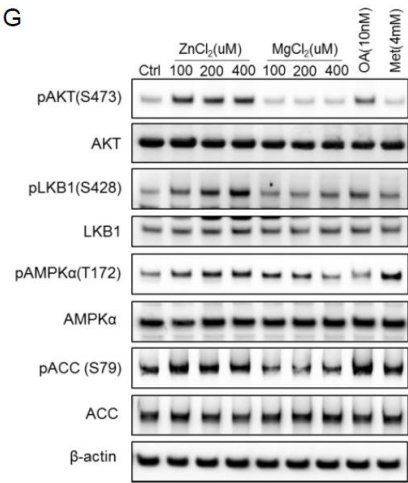

pAKT

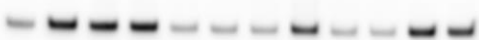

AKT

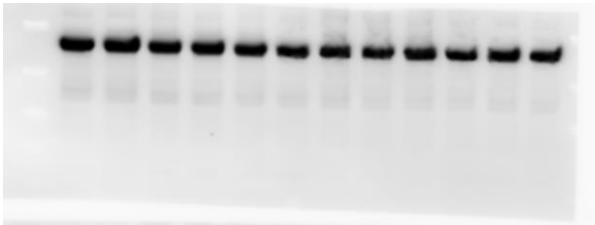

pLKB1

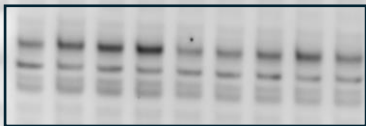

LKB1

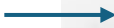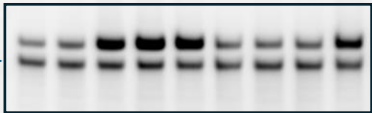

Figure 5

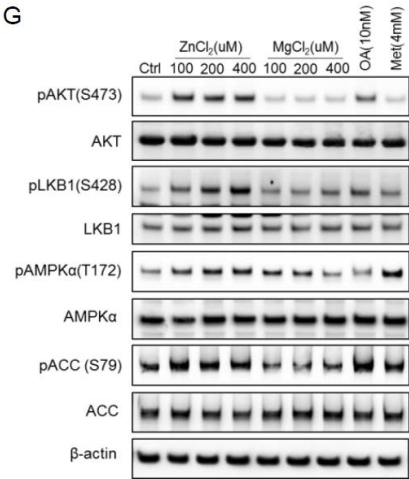

pAMPK

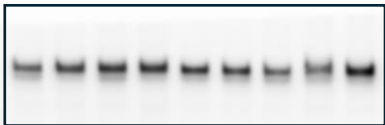

AMPK

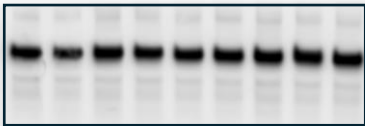

pACC

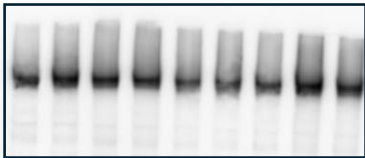

ACC

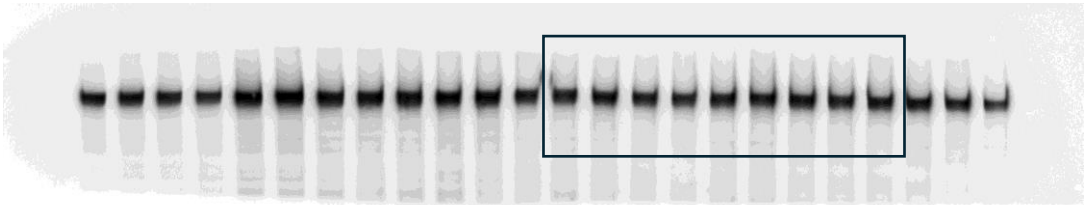

Bactin

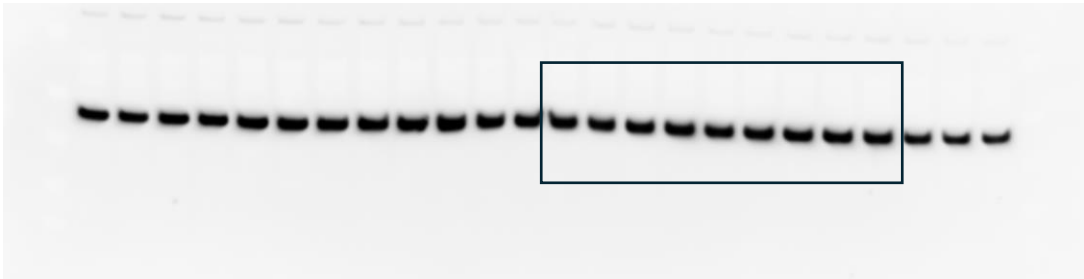

Supplement: fig5-data2 [file elife-90419-fig5-data2-v1.zip]
