# Supplementary material for: Genetic inactivation of zinc transporter SLC39A5 improves liver function and hyperglycemia in obesogenic settings
Source: eLife journal article supplement (doi:10.7554/elife.90419), 2023-09-19

Figure 5-figure supplement 3

B

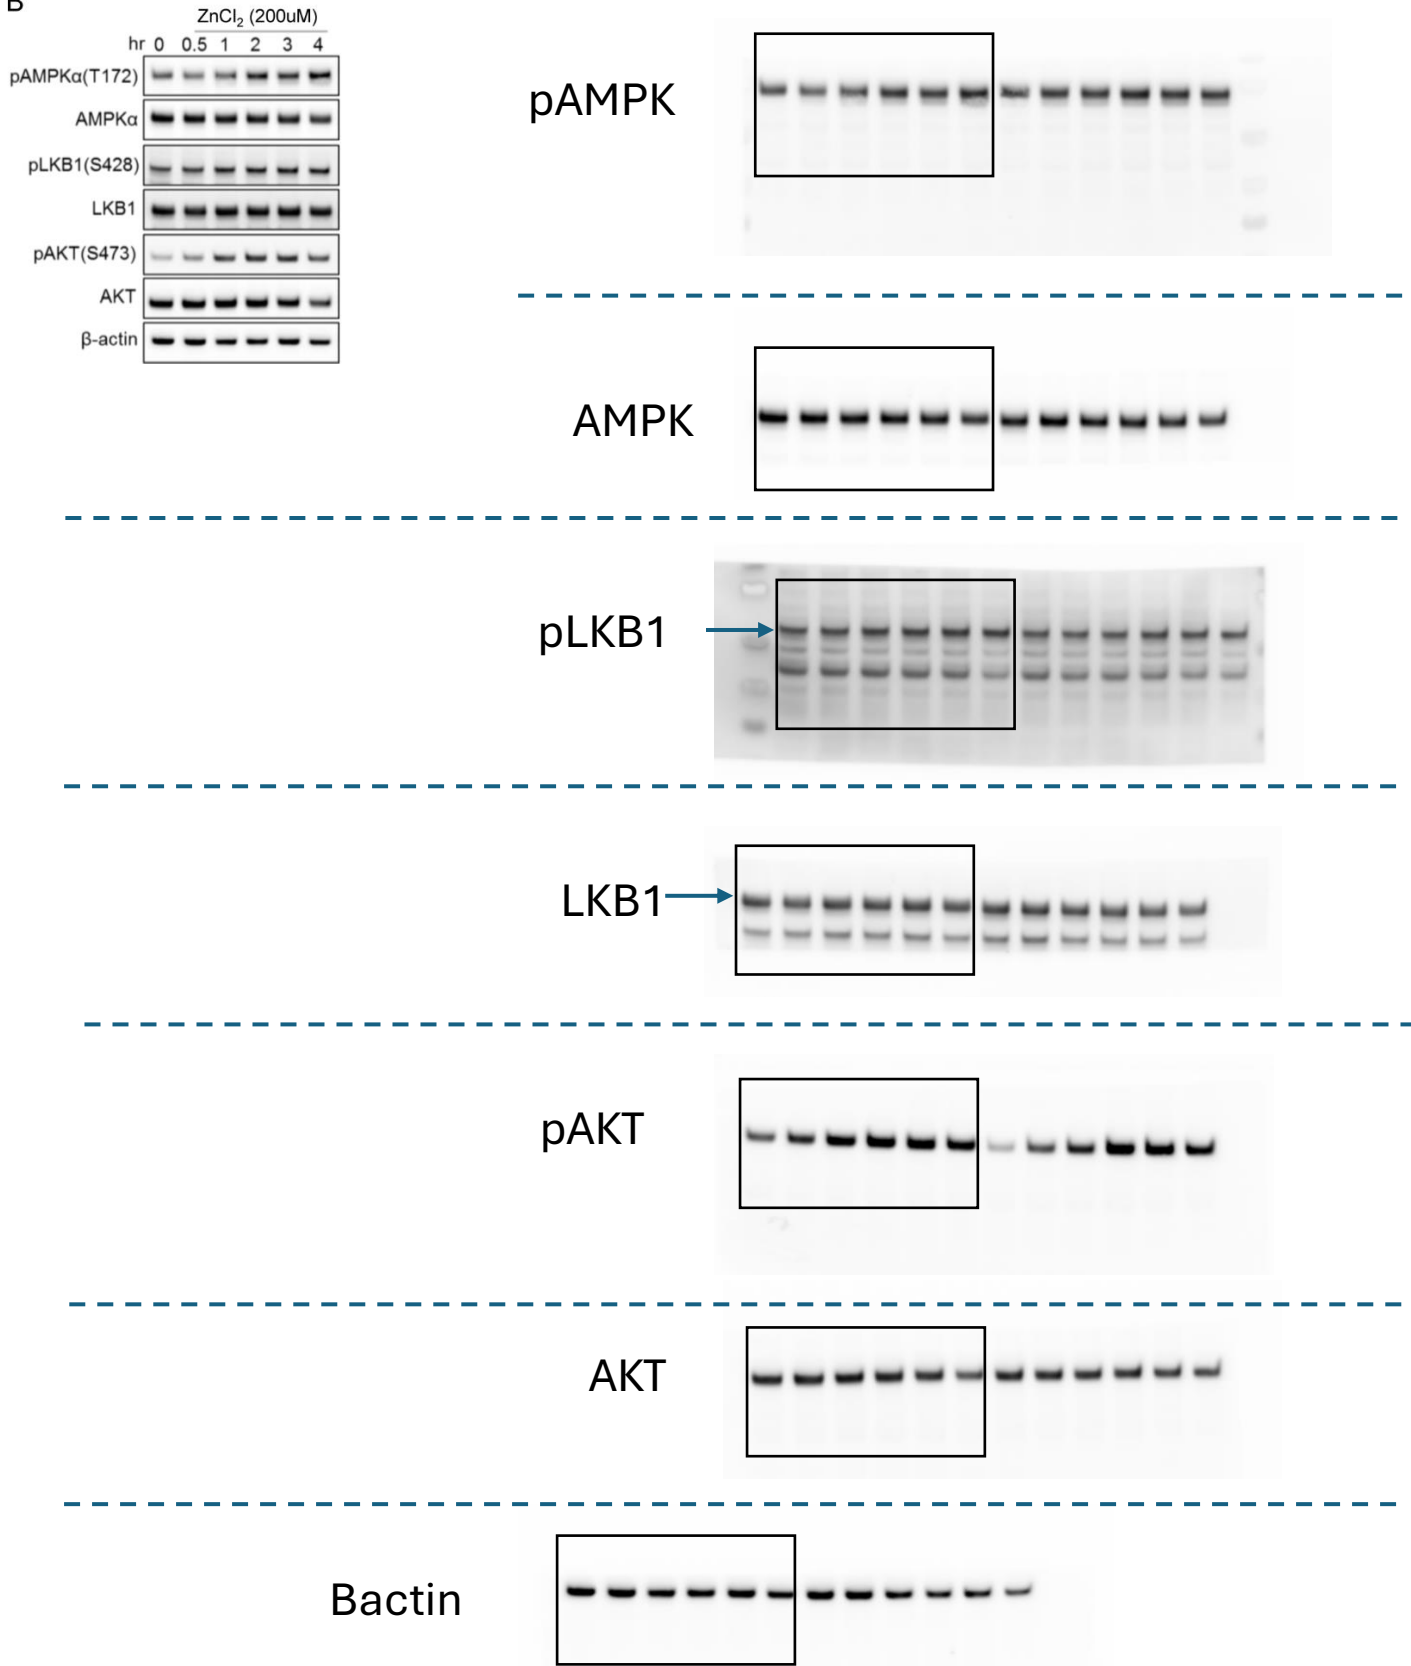

# Supplementary Figure 13

C

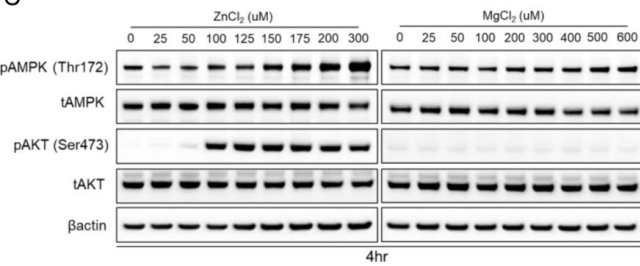

pAMPK

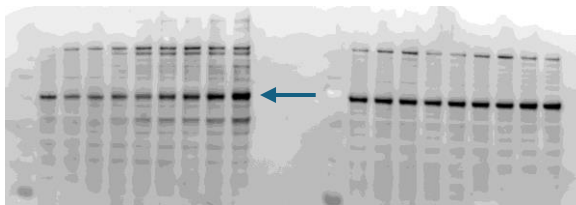

AMPK

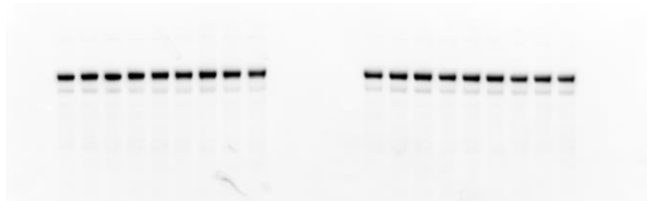

pAKT

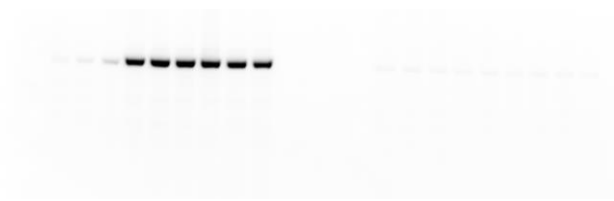

AKT

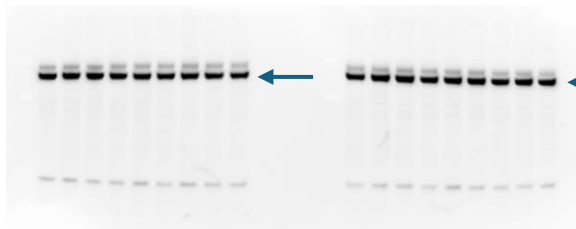

Bactin

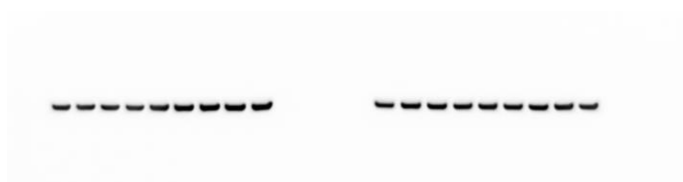

# Supplementary Figure 13

D

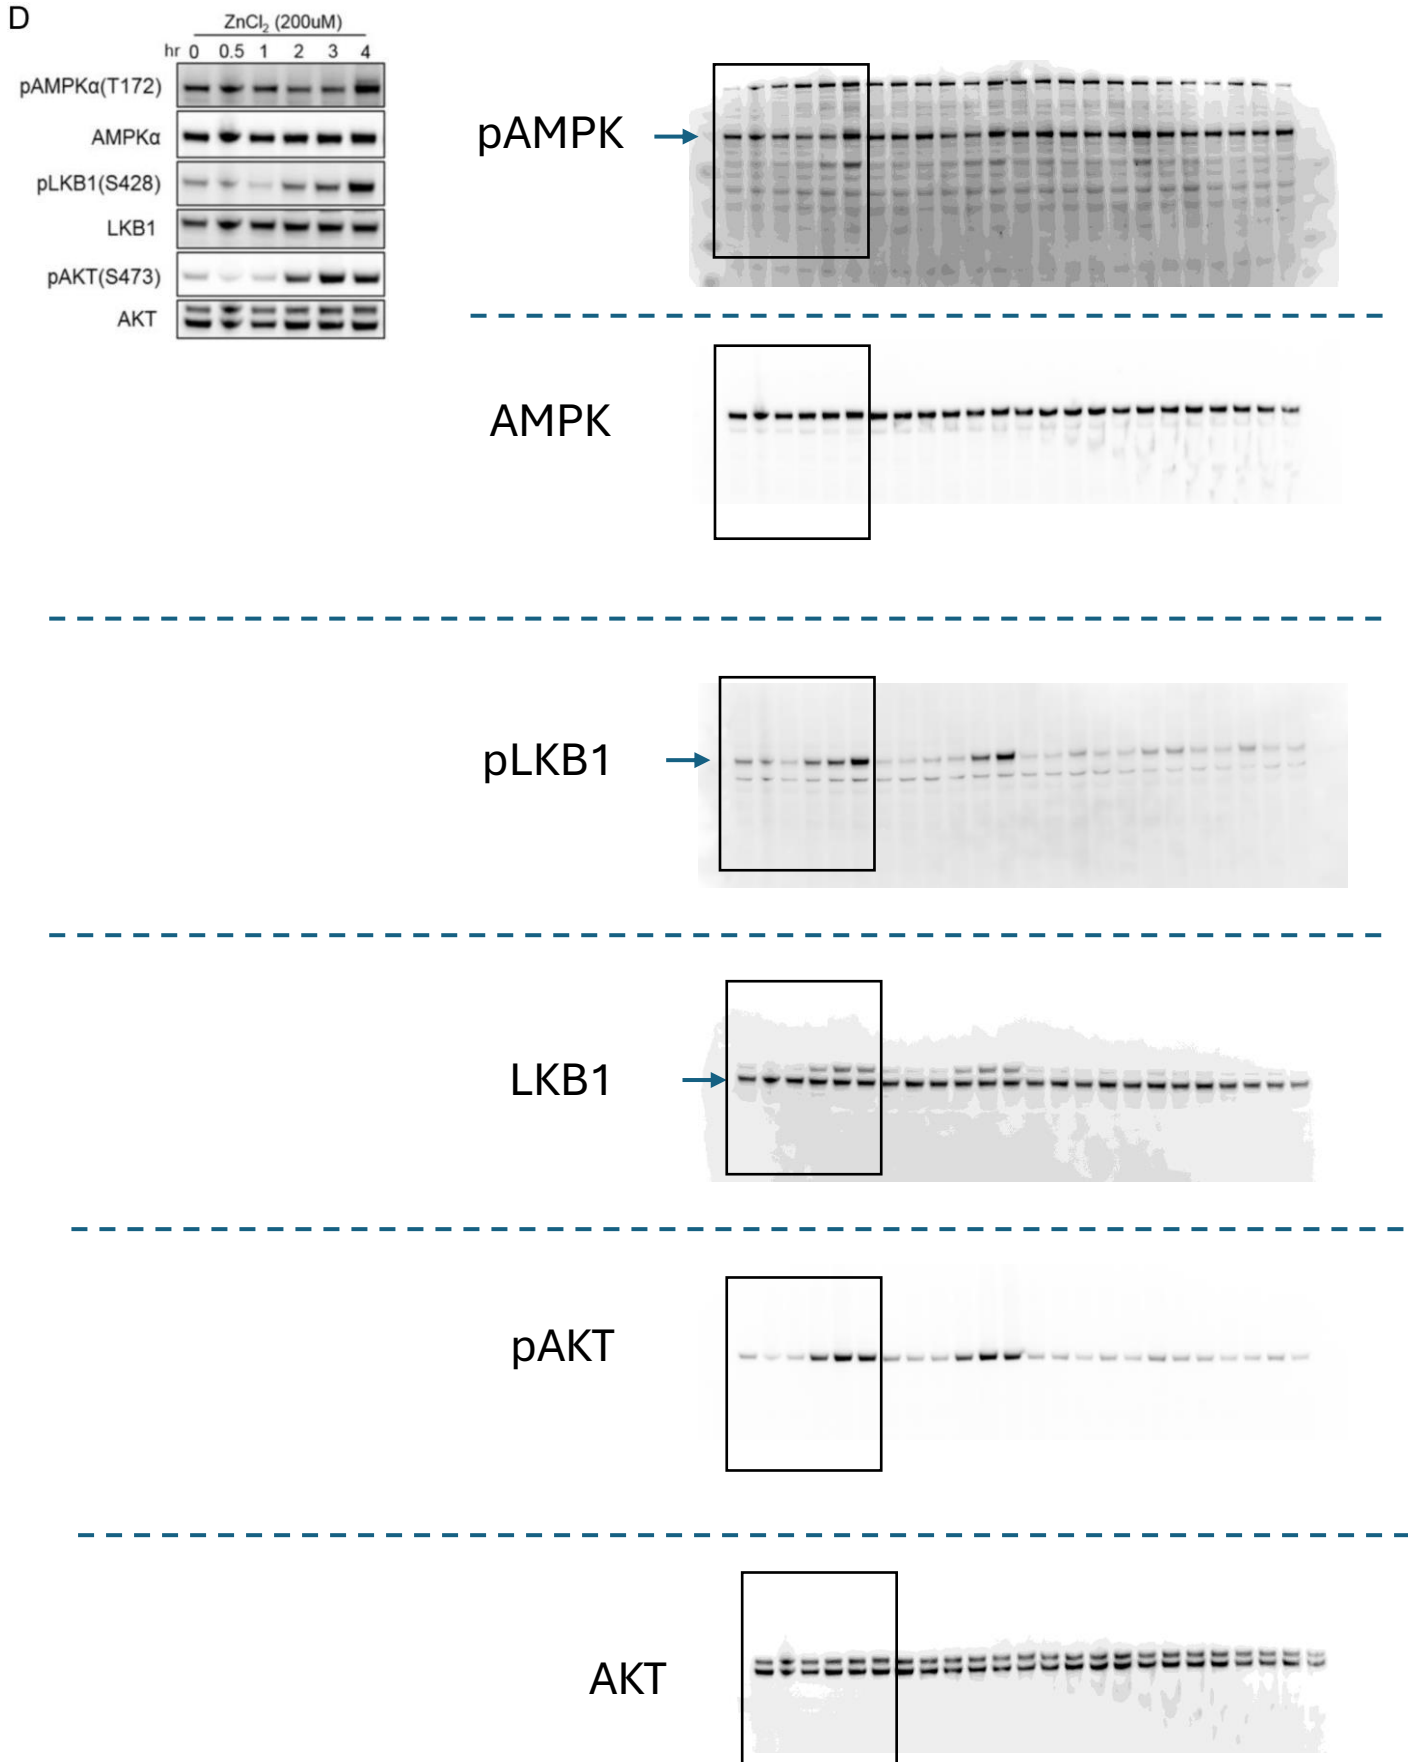

Supplement: fig5-figsupp3-data2 [file elife-90419-fig5-figsupp3-data2-v1.zip]
