# Supplementary material for: Genetic inactivation of zinc transporter SLC39A5 improves liver function and hyperglycemia in obesogenic settings
Source: eLife. 2024 Dec 13;12:RP90419. doi: 10.7554/eLife.90419 (PMC11648992; doi:10.7554/eLife.90419)
Supplement: Supplementary file 1. — Serum zinc levels in SLC39A5 heterozygous loss of function carriers are elevated by 12% as compared to age, sex, and BMI-matched reference controls. Analyses of insulin production (insulin/c-peptide ratio), insulin clearance (proinsulin/insulin), and blood glucose in these samples demonstrated no differences based on genotype. Data is represented in a graphical format in Figure 1. [file elife-90419-supp1.xlsx]

## Sheet: Sheet1
	Measure	Zinc		Insulin, pM		Proinsulin, pM		C-Peptide, pM		Proinsulin/Insulin		Insulin/C-Peptide		Glucose
	SLC39A5	Ref	Het	Ref	Het	Ref	Het	Ref	Het	Ref	Het	Ref	Het	Ref	Het
	Mean	1.576	1.766	112.6	118.7	30.95	28.65	661.8	629.6	0.3222	0.2895	0.2331	0.2336	106.6	106.6
	Median	1.513	1.744	70.5	82.05	18	16.7	475.1	480.6	0.258	0.239	0.145	0.154	103	106
	N	248	90	246	86	253	91	253	91	246	86	247	86	247	87
	P values	0.0024		0.682		0.5994		0.6449		0.2249		0.9924		0.9912
	Suppl. Table 1.Serum zinc and insulin profile assessment in the serum call back study. Serum zinc levels in SLC39A5 heterozygous loss of function carriers are elevated by 12% as compared to age, sex, BMI-matched reference controls. Analyses of insulin production (insulin/c-peptide ratio), insulin clearance (proinsulin/insulin) and blood glucose in these samples demonstrated no differences based o…
