# Supplementary material for: Genetic inactivation of zinc transporter SLC39A5 improves liver function and hyperglycemia in obesogenic settings
Source: eLife. 2024 Dec 13;12:RP90419. doi: 10.7554/eLife.90419 (PMC11648992; doi:10.7554/eLife.90419)
Supplement: Supplementary file 2. — Human data adapted from Jackson et al., 1982 *p<0.05; **p<0.01, ***p<0.001, not significant (n.s.), unpaired t-test. Values represent mean ± SD. [file elife-90419-supp2.xlsx]

## Sheet: Sheet1
	Tissues	Human		Mouse
		Normal Adult		Adult Female								Adult Male
				Slc39a5+/+		Slc39a5-/-		P values (Slc39a5+/+ vs Slc39a5-/-)	Slc39a5+/-		P values (Slc39a5+/+ vs Slc39a5+/-)	Slc39a5+/+		Slc39a5-/-		P value smmary	Slc39a5+/-		P values (Slc39a5+/+ vs Slc39a5+/-)
		ug/g	uM	ug/g	uM	ug/g	uM		ug/g	uM		ug/g	uM	ug/g	uM		ug/g	uM
	Plasma/serum	1	15	1.0 ± 0.1	15 ± 1.5	3.7 ± 0.4	57.0 ± 6.1	***	1.2 ± 0.2	18.9 ± 2.3	***	1.1 ± 0.1	16.5 ± 1.5	3.5 ± 0.2	54 ± 3.1	***	1.3 ± 0.1	20.2 ± 1.3	**
	Liver	58	887	26.7 ± 4.4	408 ± 67.3	45.5 ± 2.2	696 ± 33.6	***	29.4 ± 4.5	449 ± 68.3	n.s.	28.2 ± 2.4	431 ± 36.7	36.9 ± 2.4	564 ± 36.7	**	29.2 ± 1.9	446 ± 29.6	n.s.
	Skeletal muscle	51	780	10.0 ± 1.2	153 ± 1.2	11.2 ± 1.2	171 ± 18.4	n.s.	10.8 ± 0.7	164 ± 10.6	n.s.	8.4 ± 0.7	128 ± 10.7	8.6 ± 1.6	132 ± 24.5	n.s.	7.8 ± 1.2	118 ± 17.7	n.s.
	Bone	100	1530	113 ± 12.5	1728 ± 191	429 ± 58.4	6562 ± 893	***	145 ± 12.9	2217 ± 197	**	98.5 ± 8.6	1506 ± 131	378 ± 55.3	5777 ± 846	***	114 ± 8.8	1743 ± 134	*
	Brain	11	168	16.5 ± 0.7	252 ± 11.2	18.1 ± 1.7	277 ± 25.7	**	N/A	N/A	N/A	16.9 ± 0.7	259 ± 10.2	18.0 ± 1.5	275 ± 22.9	*	N/A	N/A	N/A
	Kidney	55	841	15.2 ± 0.4	232 ± 6.1	17.3 ± 0.3	265 ± 4.6	***	15.4 ± 0.3	235 ± 5.1	n.s.	16.2 ± 0.2	248 ± 3.1	17.8 ± 0.5	272 ± 7.6	***	16.4 ± 0.4	251 ± 6.6	n.s.
	Pancreas	N/A	N/A	45.6 ± 7.2	697 ± 110	29.7 ± 1.3	454 ± 19.9	**	48.4 ± 9.2	739 ± 140	n.s.	40.4 ± 3.0	618 ± 45.9	26.9 ± 2.6	411 ± 39.8	***	38.9 ± 2.1	595 ± 31.9	n.s.
	Fat	N/A	N/A	<0.3	N/A	<0.3	N/A	N/A	<1.0	N/A	N/A	<0.3	N/A	<0.3	N/A	N/A	<1.0	N/A	N/A
	Suppl. Table 2: Tissue zinc content in human and mouse. Human data adapted from Jackson et. al1. *p<0.05; **p<0.01, ***p<0.001, not significant (n.s.), upaired t-test. Values represent mean ± SD.
