# Supplementary material for: Genetic inactivation of zinc transporter SLC39A5 improves liver function and hyperglycemia in obesogenic settings
Source: eLife. 2024 Dec 13;12:RP90419. doi: 10.7554/eLife.90419 (PMC11648992; doi:10.7554/eLife.90419)
Supplement: Supplementary file 3. — Serum chemistry analysis in adult mice (40 wk of age, both sexes) demonstrated no differences in pancreatic amylase, renal function parameters (blood urea nitrogen, creatinine, total protein, and uric acid), and electrolytes (chloride, potassium, and sodium) or liver enzymes (alanine aminotransferase; ALT and aspartate aminotransferase; AST). [file elife-90419-supp3.xlsx]

## Sheet: Slc39a5 Serum Chem
	Serum Chemistry (40 weeks of age)	Female						Male
		Slc39a5 +/+ (n=6)		Slc39a5 -/- (n=6)		Fold Change (KO/WT)	P values	Slc39a5 +/+ (n=6)		Slc39a5 -/- (n=6)		Fold Change (KO/WT)	P values
		Mean	SEM	Mean	SEM			Mean	SEM	Mean	SEM
	ALT (U/l)	43	5.99305	35.9	7.16698	0.834884	n.s.	79.2	12.08	67	13.011	0.84596	n.s.
	AST (U/l)	147	21.4922	180.6	53.5021	1.22857	n.s.	133.733	14.0995	130.286	16.1995	0.97422	n.s.
	Albumin (g/dl)	3.48333	0.124944	3.68333	0.107755	1.05742	n.s.	4.13333	0.0881917	3.98333	0.16816	0.96371	n.s.
	Alkaline Phosphatase (U/l)	113.5	10.0888	132.167	9.11927	1.16446	n.s.	95	6.55744	95.6667	10.3075	1.00702	n.s.
	Alanine Transaminase (U/l)	46.1667	13.6221	61.5	16.0681	1.33213	n.s.	129	16.4256	53.8333	17.8389	0.417313	*
	Aspartate Transaminase (U/l)	169.5	24.6438	192.167	37.1685	1.13373	n.s.	263.333	29.6846	185.167	44.6284	0.703165	n.s.
	Amylase (U/l)	3960.67	871.825	2864.2	368.353	0.723161	n.s	3317.4	272.77	2843	94.5907	0.856996	n.s.
	Blood Urea Nitrogen (mg/dl)	20.5	0.885061	21.8333	0.654047	1.06504	n.s.	23	0.516398	25.3333	0.333333	1.10145	*
	Creatinine (mg/dl)	0.126667	0.017062	0.155	0.0183938	1.22368	n.s.	0.176667	0.0176383	0.181667	0.0101379	1.0283	n.s.
	Total Protein (g/dl)	5.23333	0.202759	5.76667	0.102198	1.10191	*	6.23333	0.120185	5.83333	0.217051	0.935829	n.s.
	Uric Acid (mg/dl)	1.28333	0.199025	1.61667	0.0945751	1.25974	n.s.	2.75	0.301938	2.25	0.270493	0.818182	n.s.
	Chloride (mmol/l)	103.667	1.58465	104.667	1.33333	1.00965	n.s.	106.5	0.67082	106.5	2.04532	1	n.s.
	Potassium (mmol/l)	8.68333	0.291452	9.38333	0.567108	1.08061	n.s.	10	0.46404	11.35	0.428758	1.135	n.s.
	Sodium (mmol/l)	145	2.44949	147.167	2.28643	1.01494	n.s.	149.667	1.33333	147	2.48998	0.982183	n.s.
	Calcium (mg/dl)	9.26667	0.252543	9.73333	0.224598	1.05036	n.s.	10.0667	0.160555	9.93333	0.22161	0.986755	n.s.
	Magnesium (mg/dl)	2.56667	0.12561	2.93333	0.108525	1.14286	n.s.	3	0.178885	3.2	0.121106	1.06667	n.s.
	Iron (ug/dl)	90.6667	8.39709	94	7.4117	1.03676	n.s.	114	6.87508	99.3333	4.73756	0.871345	n.s.
	Suppl. Table 3: No differences in serum chemistry profile of Slc39a5+/+ and Slc39a5-/- mice. Serum chemistry analysis in adult mice (40 weeks of age, both sexes) demonstrated no differences in pancreatic amylase, renal function parameters (blood urea nitrogen, creatinine, total protein and uric acid) and electrolytes (chloride, potassium and sodium) or liver enzymes (alanine aminotransferase; ALT…
