# Supplementary material for: Genetic inactivation of zinc transporter SLC39A5 improves liver function and hyperglycemia in obesogenic settings
Source: eLife. 2024 Dec 13;12:RP90419. doi: 10.7554/eLife.90419 (PMC11648992; doi:10.7554/eLife.90419)
Supplement: Supplementary file 4. — Loss of Slc39a5 improves glycemic traits and liver function in leptin-receptor (Lepr) deficient mice. Loss of Slc39a5 does not change insulin production (proinsulin/insulin), or insulin clearance (insulin/c-peptide ratio). [file elife-90419-supp4.xlsx]

## Sheet: dKO Table
		Sex	Slc39a5+/+			Slc39a5-/-			% change in Slc39a5-/- to Slc39a5+/+	P value	Lepr-/-			% change in Lepr-/- to Slc39a5+/+	P value	Slc39a5-/-; Lepr-/-			% change in Slc39a5-/-; Lepr-/- to Lepr-/-	P value
	BW (g) at 34 weeks	F	26.6545	±	0.922385	27.295	±	0.775043	0.024028	n.s.	69.3211	±	2.23716	1.60072	***	65.3645	±	1.91762	-0.0570766	n.s.
		M	36.0308	±	1.41169	33.8231	±	1.24361	-0.0612724	n.s.	65.4772	±	1.48576	0.817259	***	59.3844	±	2.48105	-0.0930529	n.s.
	Hepatic Zinc (ug/g)	F	37.9286	±	1.16895	55.56	±	2.33572	0.464859	***	25.5278	±	0.693942	-0.326951	***	32.0375	±	1.35394	0.255005	**
		M	37.785	±	1.142	45.8923	±	1.2151	0.214564	**	23.9053	±	1.19219	-0.367335	***	34.9611	±	1.98345	0.462486	***
	Fasting Blood Glucose (mg/dL)	F	142.875	±	5.45906	114.2	±	8.1939	-0.2007	n.s.	237.625	±	13.5422	0.663167	***	173	±	11.6476	-0.271962	**
		M	167.75	±	9.99955	162.5	±	7.89409	-0.0312966	n.s.	245.778	±	8.59874	0.465143	***	207.75	±	8.08382	-0.154724	*
	GTT AUC (x103)	F	28.6268	±	0.864194	26.7002	±	1.21898	-0.0672989	n.s.	67.744	±	2.8597	1.36646	***	50.5515	±	2.33552	-0.253786	***
		M	35.749	±	1.83716	35.3553	±	1.33782	-0.011012	n.s.	69.3761	±	2.54108	0.940645	***	59.4799	±	3.27114	-0.142646	*
	ITT AUC (x103)	F	18.379	±	0.7118	17.2546	±	0.373951	-0.0611785	n.s.	60.8328	±	7.70772	2.30991	***	40.6609	±	5.26986	-0.331597	*
		M	25.7926	±	1.17175	25.2953	±	1.03535	-0.0192804	n.s.	58.5536	±	3.73944	1.27017	***	61.604	±	1.66067	0.0520964	n.s.
	HOMA-IR	F	7.06485	±	1.94025	2.15509	±	0.670624	-0.694956	n.s.	229.794	±	29.9665	31.5264	***	60.3234	±	16.5785	-0.737489	***
		M	13.4432	±	3.10106	15.2621	±	3.54368	0.135297	n.s.	228.104	±	26.3668	15.9679	***	138.122	±	14.7804	-0.39448	**
	Ratio (proinsulin/insulin)	F	0.1863	±	0.02877	0.1792	±	0.03001	-0.0381106	n.s.	0.5522	±	0.2334	1.96404	n.s.	0.2689	±	0.1076	-0.513039	n.s.
		M	0.1648	±	0.04799	0.132	±	0.03084	-0.199029	n.s.	0.4775	±	0.1813	1.89745	n.s.	0.2862	±	0.1315	-0.400628	n.s.
	Ratio (insulin/c-peptide)	F	0.5325	±	0.1175	0.5456	±	0.05406	0.0246009	n.s.	1.06	±	0.1271	0.99061	n.s.	1.265	±	0.4997	0.193396	n.s.
		M	2.083	±	1.454	1.151	±	0.3257	-0.447432	n.s.	2.199	±	0.4787	0.0556889	n.s.	1.174	±	0.3483	-0.466121	n.s.
	ALT (U/L)	F	31.6364	±	3.43054	51.9	±	11.2541	0.640517	n.s.	393.533	±	31.5872	11.4393	***	200.944	±	22.6628	-0.489384	***
		M	34.4615	±	2.83887	46.0769	±	13.0032	0.337054	n.s.	365.111	±	29.7273	9.59474	***	223.267	±	22.8886	-0.388497	***
	AST (U/L)	F	136.909	±	19.2219	150	±	14.5671	0.0956175	n.s.	514.467	±	74.3343	2.75772	***	264.056	±	22.2284	-0.486739	***
		M	104.923	±	7.13016	93.8333	±	16.8288	-0.105694	n.s.	400.722	±	35.1231	2.8192	***	251.067	±	23.5035	-0.373465	***
	NAFLD activity score	F	1.2	±	0.359011	1.5	±	0.223607	0.25	n.s.	9.25	±	0.179435	6.70833	***	7.25	±	0.578988	-0.216216	**
		M	1.25	±	0.25	1.25	±	0.25	0	n.s.	9.35714	±	0.132894	6.48571	***	7.15385	±	0.830864	-0.235467	*
	Hepatic TG (mg/g)	F	14.728	±	1.52887	15.8202	±	3.27846	0.0741564	n.s.	67.1055	±	3.00827	3.55632	***	29.2432	±	3.29464	-0.56422	***
		M	23.6376	±	2.6104	25.3711	±	2.62906	0.0733385	n.s.	81.123	±	5.56354	2.43195	***	55.9832	±	3.64875	-0.309897	***
	Suppl. Table 4 Summary statistics for the congenital obesity model. Loss of Slc39a5 improves glycemic traits and liver function in leptin-receptor (Lepr) deficient mice. Loss of Slc39a5 does not change insulin production (proinsulin/insulin), insulin clearance (insulin/c-peptide ratio).
