# Supplementary material for: Genetic inactivation of zinc transporter SLC39A5 improves liver function and hyperglycemia in obesogenic settings
Source: eLife. 2024 Dec 13;12:RP90419. doi: 10.7554/eLife.90419 (PMC11648992; doi:10.7554/eLife.90419)
Supplement: Supplementary file 5. — Loss of Slc39a5 improves glycemic traits and liver function in mice upon a high-fat high fructose diet (HFFD) dietary challenge. Moreover, loss of Slc39a5 does not change insulin production (proinsulin/insulin), or insulin clearance (insulin/c-peptide ratio). [file elife-90419-supp5.xlsx]

## Sheet: HFFD Table
		Sex	Slc39a5+/+ (NC)			Slc39a5-/- (NC)			% change in Slc39a5-/- (NC) to Slc39a5+/+ (NC)	P value	Slc39a5+/+ (HFFD)			% change in Slc39a5+/+ (HFFD) to Slc39a5+/+ (NC)	P value	Slc39a5-/- (HFFD)			% change in Slc39a5-/- (HFFD) to Slc39a5+/+ (HFFD)	P value
	BW (g), diet for 30 weeks	F	27.3231	±	0.612598	26.5333	±	0.869808	-0.0289039	n.s.	47.51	±	1.1028	0.738823	***	46.65	±	1.66449	-0.0181015	n.s.
		M	40.025	±	0.417582	35.7	±	1.48044	-0.108057	**	49.9467	±	0.905163	0.247887	***	49.74	±	0.791911	-0.00413775	n.s.
	Hepatic Zinc (ug/g)	F	30.3917	±	1.37524	43.8167	±	1.92038	0.441733	**	32.7294	±	1.2205	0.0769206	n.s.	47.0786	±	3.43942	0.438418	***
		M	27.9125	±	0.757786	38.6	±	1.48773	0.382893	***	27.0667	±	1.20072	-0.030303	n.s.	31.5929	±	1.1888	0.167224	n.s.
	Fasting Blood Glucose (mg/dL)	F	122.818	±	6.72961	119.5	±	8.0392	-0.027017	n.s.	188.364	±	8.23769	0.533679	***	154.667	±	7.28462	-0.178893	*
		M	151.5	±	6.84515	143.909	±	6.34959	-0.050105	n.s.	201.083	±	5.59418	0.327283	***	175.833	±	3.52445	-0.12557	*
	GTT AUC (x103)	F	30.3283	±	1.15675	27.1366	±	1.25924	-0.105238	n.s.	39.1987	±	1.74347	0.292481	***	32.2627	±	0.758794	-0.176944	**
		M	37.4379	±	0.88179	36.5866	±	1.283	-0.0227385	n.s.	44.6966	±	2.84628	0.193885	*	37.3315	±	1.47833	-0.16478	*
	ITT AUC (x103)	F	16.5649	±	0.813269	15.7997	±	1.03213	-0.0461966	n.s.	21.3162	±	0.715114	0.28683	***	17.4289	±	0.445056	-0.182364	**
		M	23.1778	±	1.10347	20.8714	±	0.731938	-0.0995119	n.s.	29.0503	±	1.13778	0.253367	***	25.2197	±	0.869957	-0.131863	*
	HOMA-IR	F	2.42133	±	0.377271	1.88357	±	0.35907	-0.222094	n.s.	16.196	±	2.61489	5.68889	***	10.2726	±	1.24308	-0.365731	*
		M	12.1446	±	2.64229	7.64611	±	1.58984	-0.370413	n.s.	31.6906	±	3.93368	1.60943	***	17.9713	±	2.07393	-0.432915	**
	Ratio (proinsulin/insulin)	F	0.201265	±	0.0283517	0.234834	±	0.0349171	0.166793	n.s.	0.19985	±	0.0319929	-0.00702811	n.s.	0.314618	±	0.0480016	0.57427	n.s.
		M	0.156588	±	0.0382488	0.141487	±	0.0158212	-0.0964336	n.s.	0.177568	±	0.03848	0.133984	n.s.	0.155242	±	0.0262118	-0.125733	n.s.
	Ratio (insulin/c-peptide)	F	0.695033	±	0.0930737	0.543296	±	0.11394	-0.218316	n.s.	1.04191	±	0.0954318	0.499082	*	0.704154	±	0.0512669	-0.32417	*
		M	1.52013	±	0.262177	1.81806	±	0.496483	0.195989	n.s.	2.89178	±	0.818284	0.902324	n.s.	2.06239	±	0.454049	-0.286808	n.s.
	ALT (U/L)	F	49.4615	±	7.97963	60.8333	±	10.7997	0.229912	n.s.	241.941	±	13.8403	3.8915	***	148.714	±	13.8879	-0.385329	***
		M	126.714	±	10.1035	84	±	16.8433	-0.337091	n.s.	388.143	±	30.9425	2.06313	***	353.643	±	41.4161	-0.0888848	n.s.
	AST (U/L)	F	173.5	±	15.0683	216.833	±	33.4919	0.24976	n.s.	449.706	±	30.6035	1.59196	***	370.786	±	34.3515	-0.175493	n.s.
		M	276.4	±	29.934	228.467	±	25.98	-0.17342	n.s.	489.786	±	37.6469	0.772018	***	458.357	±	44.2201	-0.064168	n.s.
	NAFLD activity score	F	4.5	±	0.718795	2.5	±	0.718795	-0.444444	n.s.	8.33333	±	0.333333	0.851852	**	3.33333	±	0.71492	-0.6	***
		M	5.5	±	0.428174	1.83333	±	0.749074	-0.666667	**	7.83333	±	0.703167	0.424242	n.s.	8.66667	±	0.802773	0.106383	n.s.
	Hepatic TG (mg/g)	F	23.4171	±	2.64138	22.3626	±	1.80161	-0.0450304	n.s.	43.5342	±	1.08577	0.859074	***	28.4218	±	1.73901	-0.347137	***
		M	41.5249	±	2.11229	36.2888	±	2.7625	-0.126096	n.s.	83.0113	±	2.58861	0.999075	***	60.4146	±	2.60085	-0.272212	***
	Suppl. Table 5 Summary statistics for the diet-induced obesity model. Loss of Slc39a5 improves glycemic traits and liver function in mice upon a high fat high fructose diet (HFFD) dietary challenge. Moreover, loss of Slc39a5 does not change insulin production (proinsulin/insulin), insulin clearance (insulin/c-peptide ratio).
