# Supplementary material for: Genetic inactivation of zinc transporter SLC39A5 improves liver function and hyperglycemia in obesogenic settings
Source: eLife. 2024 Dec 13;12:RP90419. doi: 10.7554/eLife.90419 (PMC11648992; doi:10.7554/eLife.90419)
Supplement: Supplementary file 6. — Loss of Slc39a5 improves hepatic inflammation and fibrosis in both female and male mice challenged with diet-induced NASH. [file elife-90419-supp6.xlsx]

## Sheet: NASH Table (3)
		Sex	Slc39a5+/+ (NC)			Slc39a5-/- (NC)			% change in Slc39a5-/- (NC) to Slc39a5+/+ (NC)	P value	Slc39a5+/+ (NASH)			% change in Slc39a5+/+ (NASH) to Slc39a5+/+ (NC)	P value	Slc39a5-/- (NASH)			% change in Slc39a5-/- (NASH) to Slc39a5+/+ (NASH)	P value
	BW (g), 40 weeks on diets	F	31.3	±	0.811524	29.0667	±	2.72087	-0.0713525	n.s.	43.4125	±	2.44974	0.386981	**	43.9727	±	1.97088	0.0129047	n.s.
		M	41.35	±	3.01966	34.95	±	4.12761	-0.154776	**	51.5882	±	3.60588	0.247599	***	51.0467	±	4.13847	-0.0104979	n.s.
	Hepatic Zinc (ug/g)	F	25.9667	±	2.01759	38.16	±	3.28299	0.469576	***	22.4375	±	2.16922	-0.135911	n.s.	31.8	±	6.48768	0.41727	***
		M	24.89	±	1.88057	35.2	±	3.33067	0.414223	***	21.1882	±	1.68593	-0.148725	***	25.8067	±	2.01617	0.217971	***
	ALT (U/L)	F	127.429	±	91.1443	98.8333	±	62.8313	-0.224402	n.s.	577.625	±	133.127	3.53293	***	322.273	±	153.683	-0.442073	***
		M	155.9	±	59.439	101.286	±	65.3751	-0.350316	n.s.	653.588	±	117.956	3.19236	***	511.4	±	85.7853	-0.21755	***
	AST (U/L)	F	317.857	±	175.019	314.667	±	186.034	-0.0100375	n.s.	890.875	±	230.643	1.80275	***	574	±	218.127	-0.35569	*
		M	257.9	±	62.4828	191.857	±	61.2955	-0.256079	n.s.	724.353	±	123.063	1.80866	***	564.467	±	137.771	-0.22073	**
	FBG	F	129	±	22.6642	113.167	±	29.8223	-0.122739	n.s.	175.375	±	20.6393	0.359496	**	129.273	±	19.5299	-0.262878	***
		M	140.3	±	11.4896	127.125	±	12.495	-0.0939059	n.s.	186	±	23.6485	0.325731	***	149.133	±	14.3321	-0.198208	***
	Macrovesicular steatosis score	F	2.42857	±	0.188982	0.833333	±	0.752773	-0.656863	***	2.5	±	0.267261	0.0294118	n.s.	2.4	±	0.459468	-0.04	n.s.
		M	1.9	±	0.843274	1.35714	±	0.944911	-0.285714	n.s.	2.70588	±	0.25365	0.424149	**	2.73333	±	0.258199	0.0101449	n.s.
	Hepatocyte hypertrophy score	F	1.71429	±	0.48795	0.5	±	0.447214	-0.708333	***	3	±	0	0.75	***	2.5	±	0.632456	-0.166667	n.s.
		M	1.5	±	0.849837	1.07143	±	1.09653	-0.285714	n.s.	3	±	0	1	***	3	±	0	0	n.s.
	Inflammation score	F	0.857143	±	0.243975	0.25	±	0.273861	-0.708333	n.s.	2.1875	±	0.53033	1.55208	***	1.36364	±	0.636039	-0.376623	**
		M	0.7	±	0.537484	0.428571	±	0.607493	-0.387755	n.s.	2.55882	±	0.300123	2.65546	***	1.8	±	0.316228	-0.296552	***
	NAFLD activity score	F	5	±	0.57735	1.58333	±	1.28128	-0.683333	***	7.6875	±	0.703943	0.5375	***	6.22727	±	1.48936	-0.189948	**
		M	4.1	±	2.14476	2.85714	±	2.59349	-0.303136	n.s.	8.26471	±	0.312132	1.01578	***	7.66667	±	0.308607	-0.0723606	n.s.
	Fibrosis score	F	0.285714	±	0.393398	0.25	±	0.41833	-0.125	n.s.	2.5	±	0.534522	7.75	***	1.27273	±	0.517863	-0.490909	***
		M	0.3	±	0.483046	0.142857	±	0.243975	-0.52381	n.s.	2.82353	±	0.350944	8.41176	***	2.2	±	0.455129	-0.220833	***
	Steatosis-activity-fibrosis score	F	5.28571	±	0.809174	1.83333	±	1.60208	-0.653153	***	10.25	±	0.755929	0.939189	***	7.40909	±	1.51357	-0.277162	***
		M	4.4	±	2.40139	3	±	2.81366	-0.318182	n.s.	11.0882	±	0.363803	1.52005	***	9.86667	±	0.58146	-0.110168	n.s.
	Suppl. Table 6 Summary statistics for the diet-induced NASH model. Loss of Slc39a5 improves hepatic inflammation and fibrosis in both female and male mice challenged with diet-induced NASH.
