# Supplementary figures and images for: Genetic inactivation of zinc transporter SLC39A5 improves liver function and hyperglycemia in obesogenic settings
Source: eLife journal article supplement (doi:10.7554/elife.90419), 2023-09-19

# Figure 2-figure supplement 1

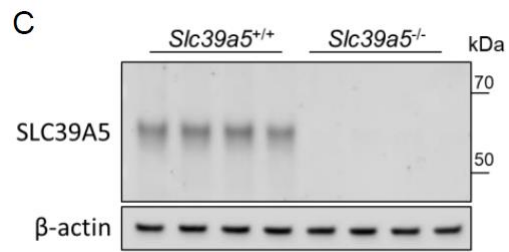

SLC39A5

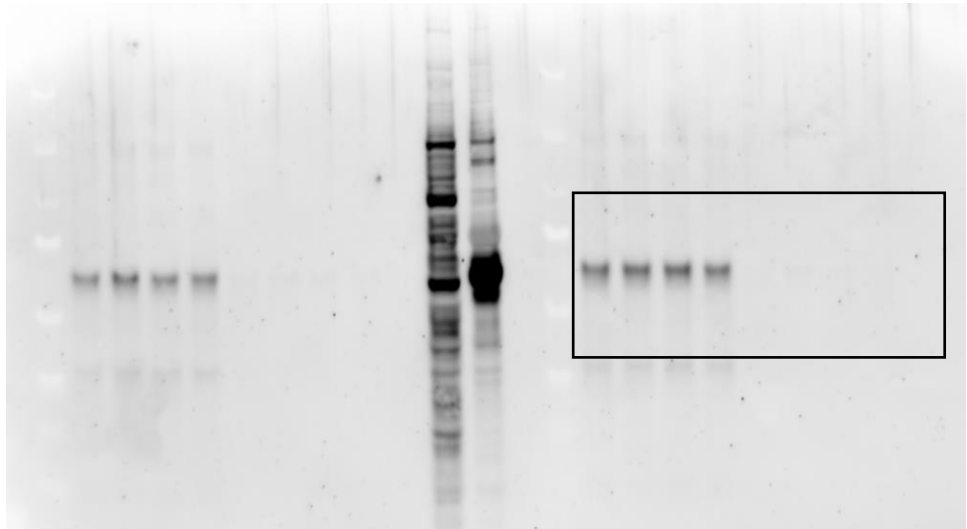

Bactin

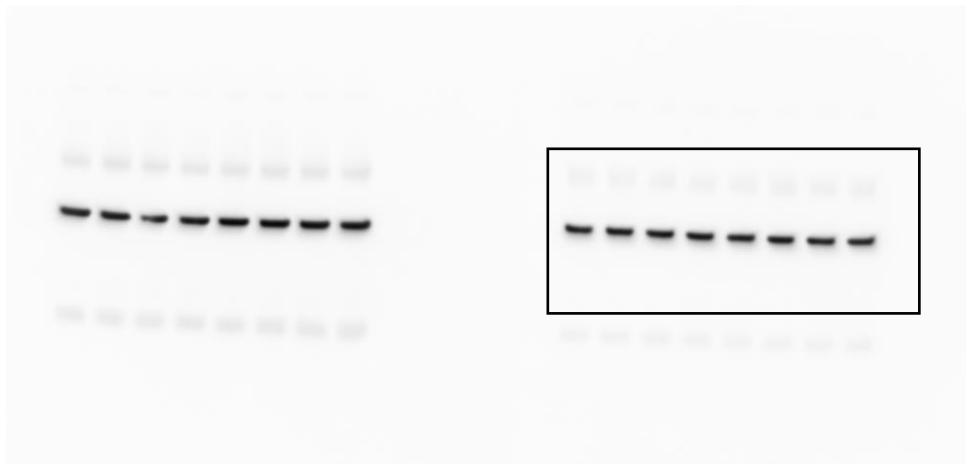

Supplement: fig2-figsupp1-data2 [file elife-90419-fig2-figsupp1-data2-v1.zip]

Figure 3-figure supplement 1

C

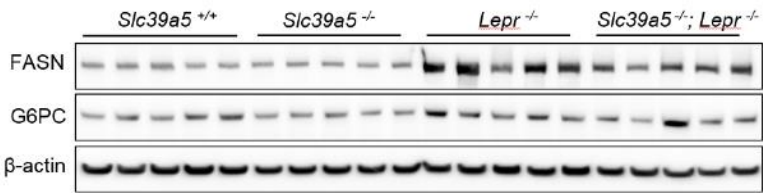

FASN

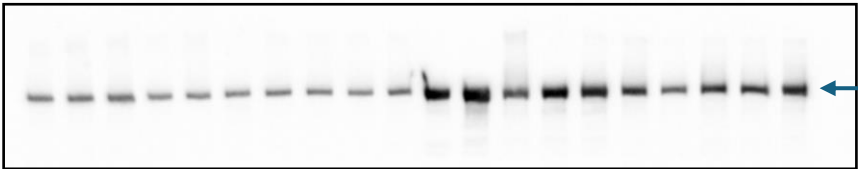

Female

G6PC

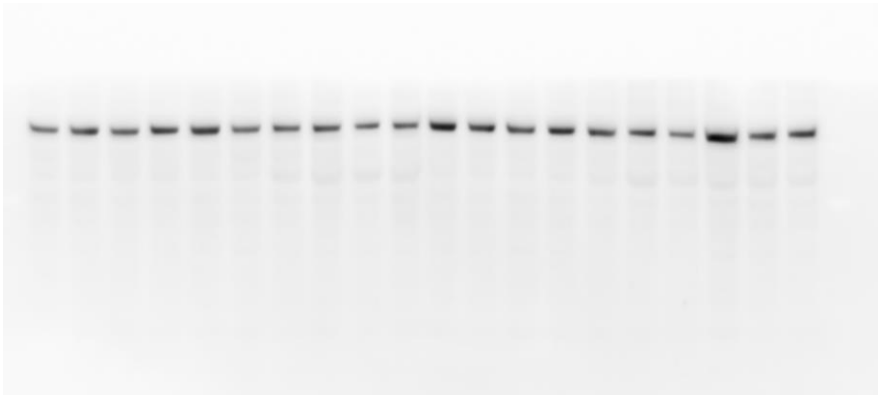

Bactin

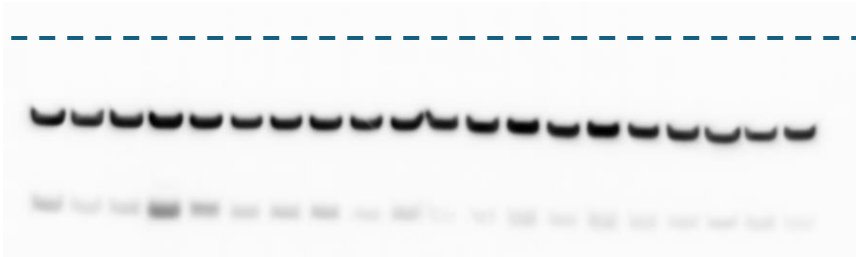

Supplement: fig3-figsupp1-data2 [file elife-90419-fig3-figsupp1-data2-v1.zip]

Figure 3-figure supplement 2

C

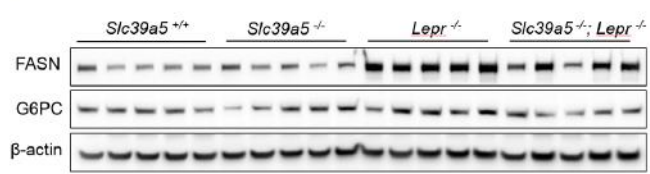

FASN

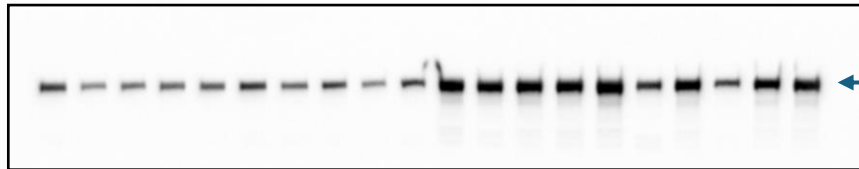

Male

G6PC

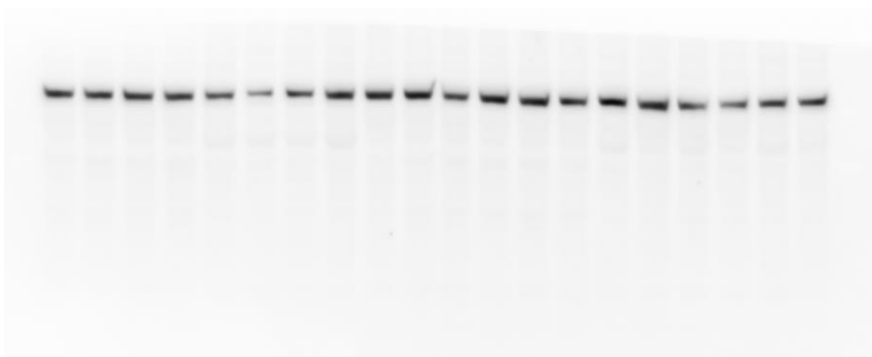

Bactin

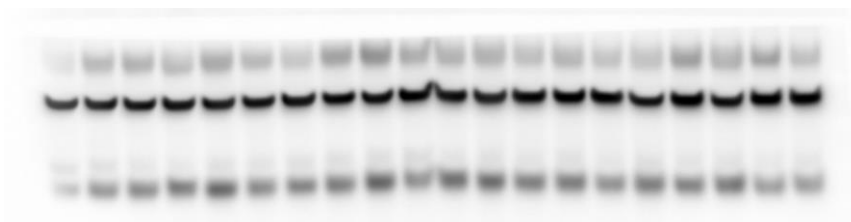

Supplement: fig3-figsupp2-data2 [file elife-90419-fig3-figsupp2-data2-v1.zip]

Figure 3-figure supplement 3

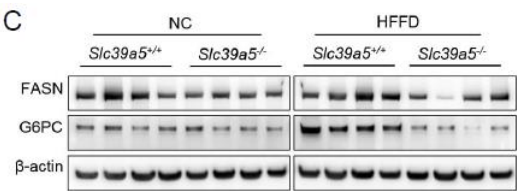

FASN

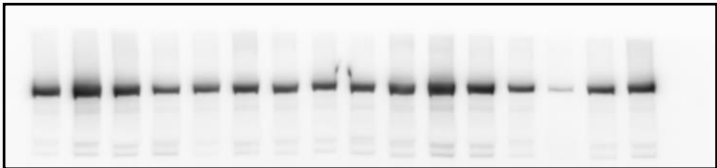

G6PC

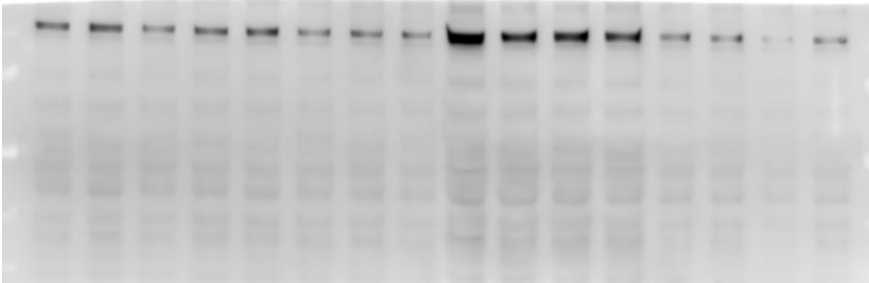

Bactin

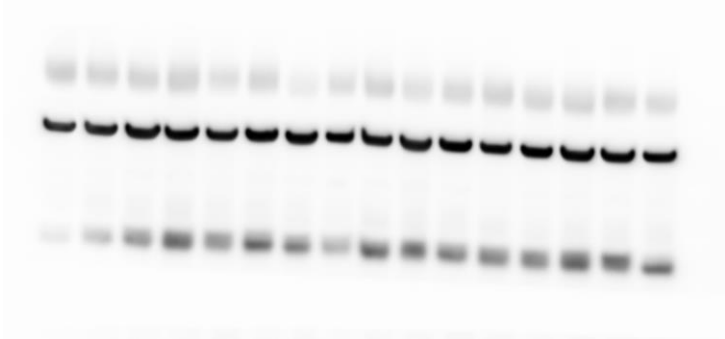

Supplement: fig3-figsupp3-data2 [file elife-90419-fig3-figsupp3-data2-v1.zip]

Figure 3-figure supplement 4

C

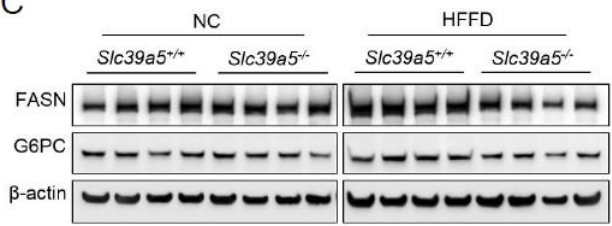

FASN

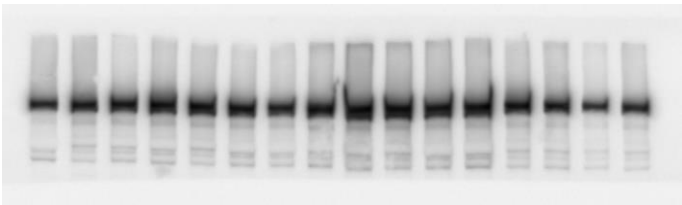

G6PC

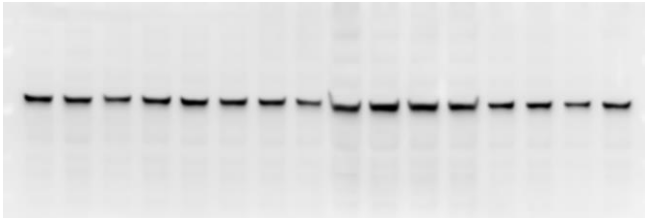

Bactin

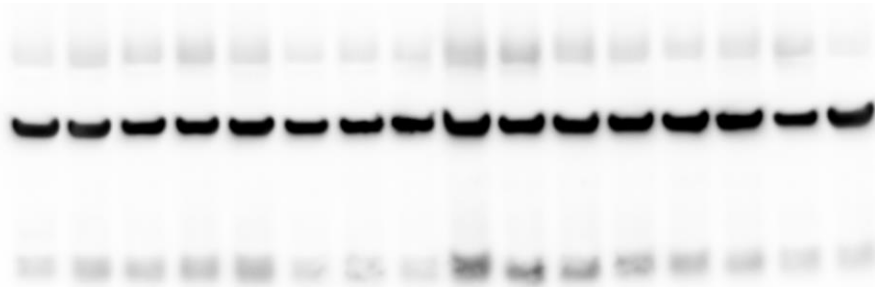

Supplement: fig3-figsupp4-data2 [file elife-90419-fig3-figsupp4-data2-v1.zip]

Figure 5-figure supplement 1

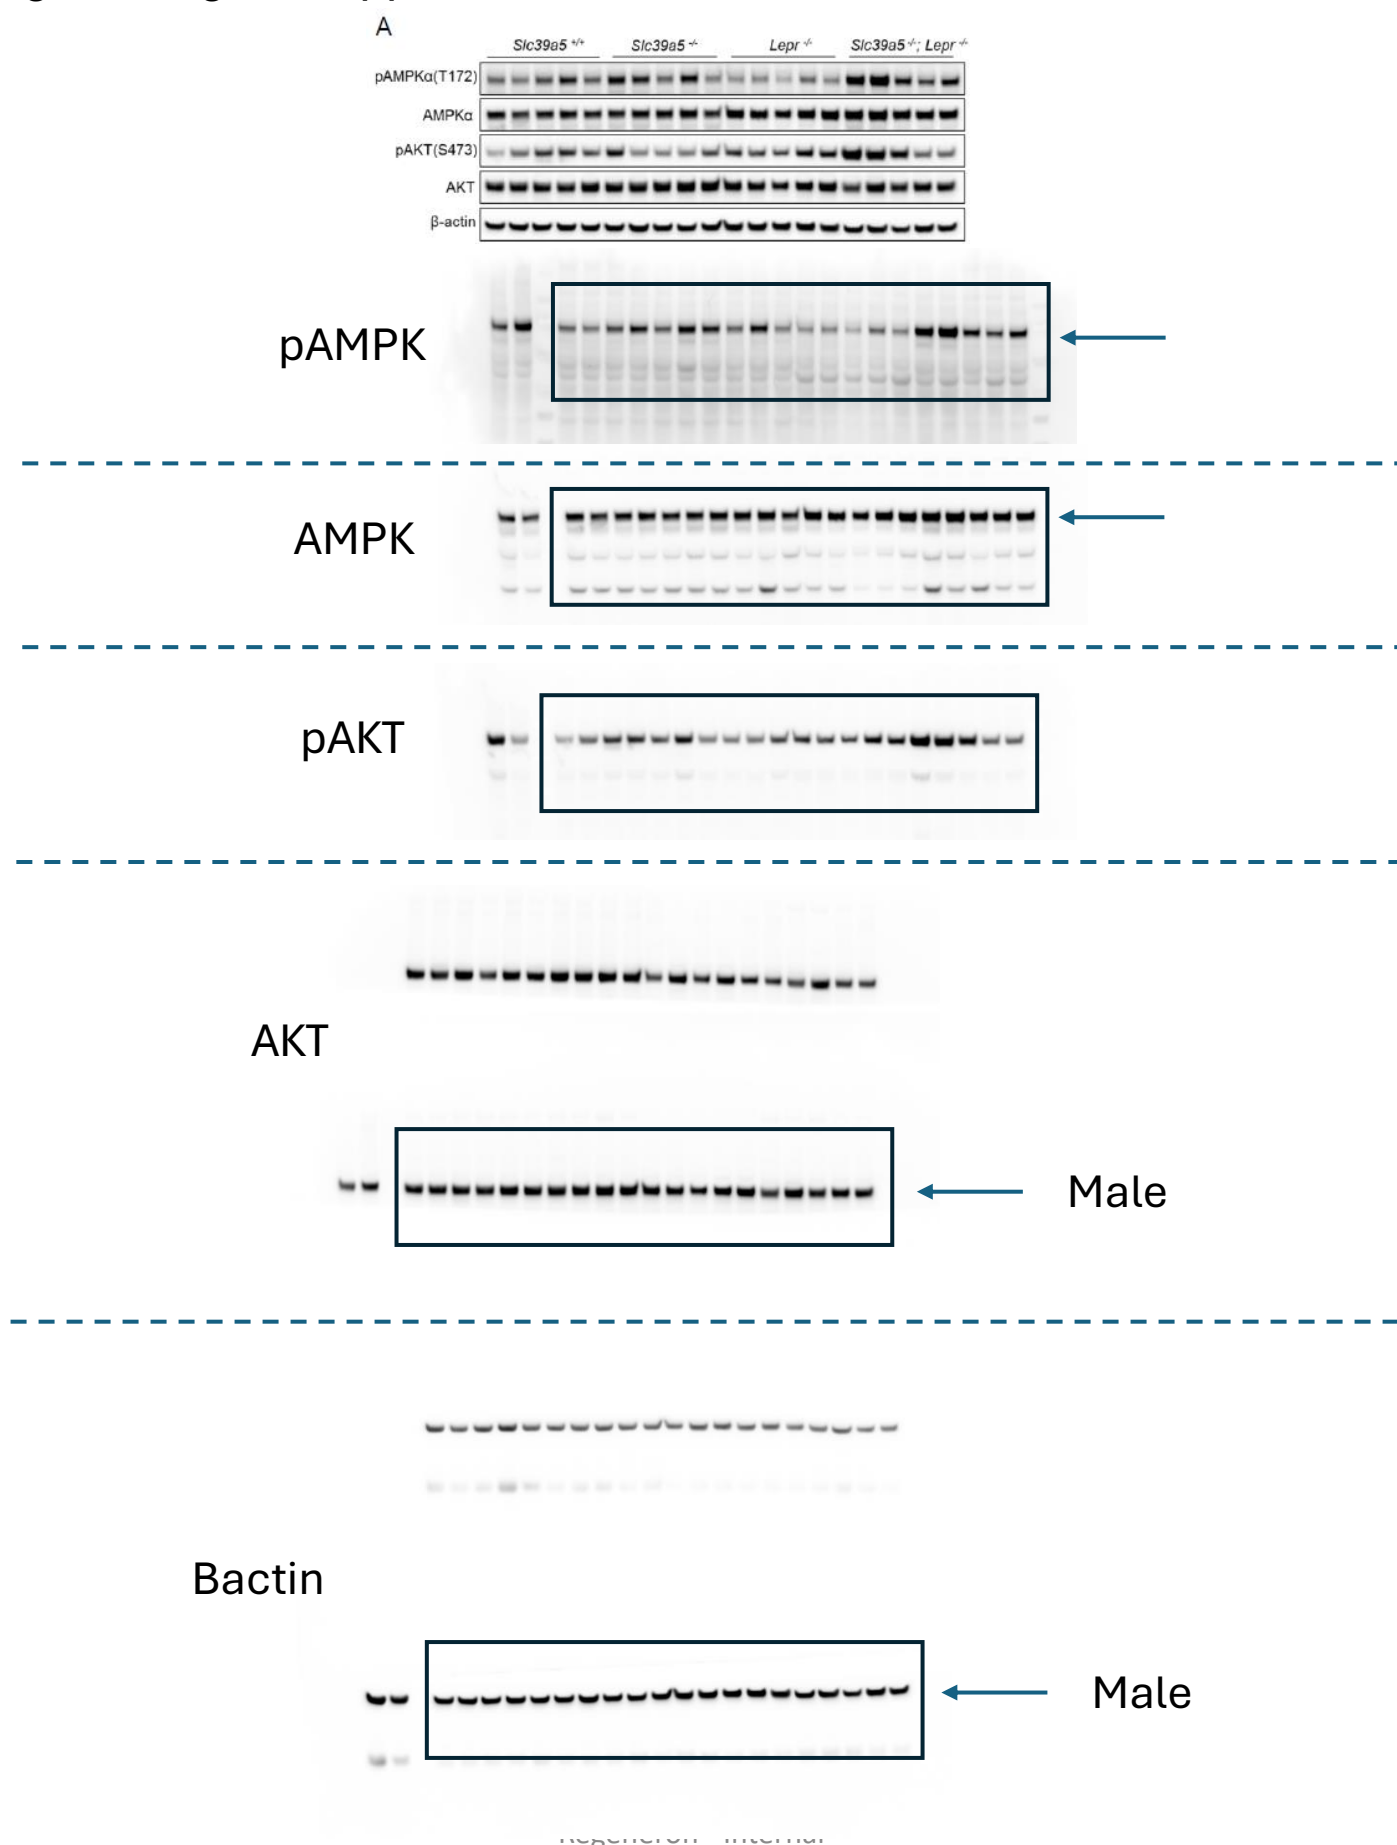

Supplementary Figure 10

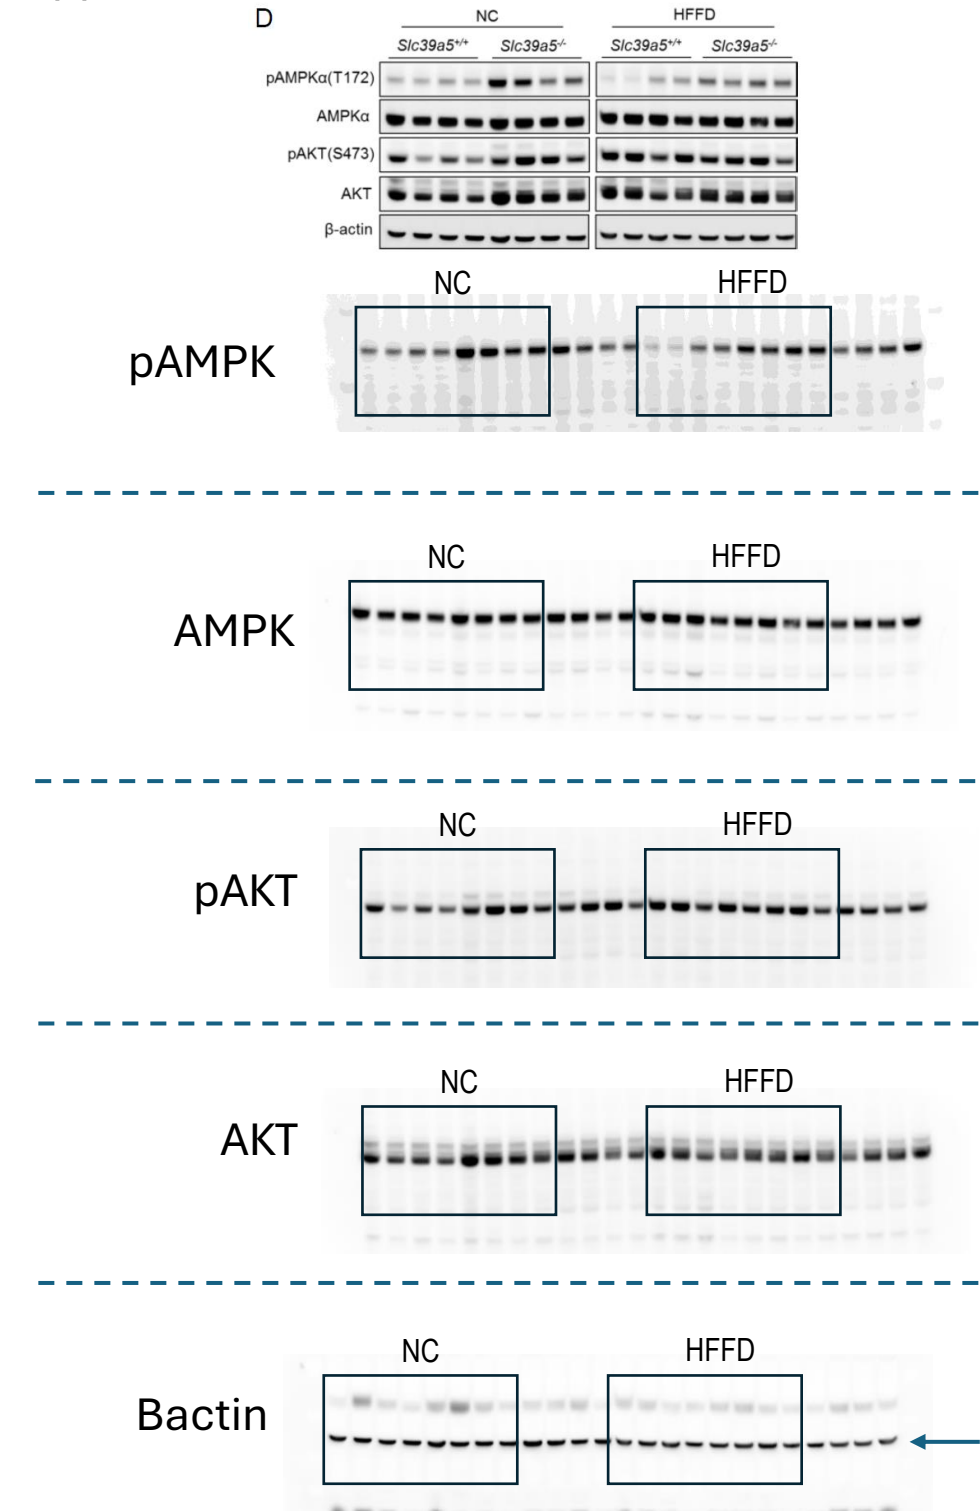

Supplement: fig5-figsupp1-data2 [file elife-90419-fig5-figsupp1-data2-v1.zip]
